# Supplementary material for: A single-band ratiometric luminescent thermometer based on tetrafluorides operating entirely in the infrared region
Source: Royal Society of Chemistry journal article supplement (doi:10.1039/d1na00727k), 2021-11-12
Supplement: d1na00727k1.pdf [file d1na00727k1.pdf]

## Supporting Information

### A single-band ratiometric luminescent thermometer based on tetrafluorides operating entirely in the infrared region

K. Trejgis<sup>1\*</sup>, K. Ledwa<sup>1</sup>, A. Bednarkiewicz<sup>1</sup>, L. Marciniak<sup>1\*</sup>

<sup>1</sup>Institute of Low Temperature and Structure Research, Polish Academy of Sciences, Okolna 2, 50-422 Wrocław, Poland

\* corresponding author: [k.trejgis@intibs.pl](mailto:k.trejgis@intibs.pl), [l.marciniak@intibs.pl](mailto:l.marciniak@intibs.pl)

**KEYWORDS** excited state absorption, SBR approach, luminescence thermometry, fluoride, neodymium

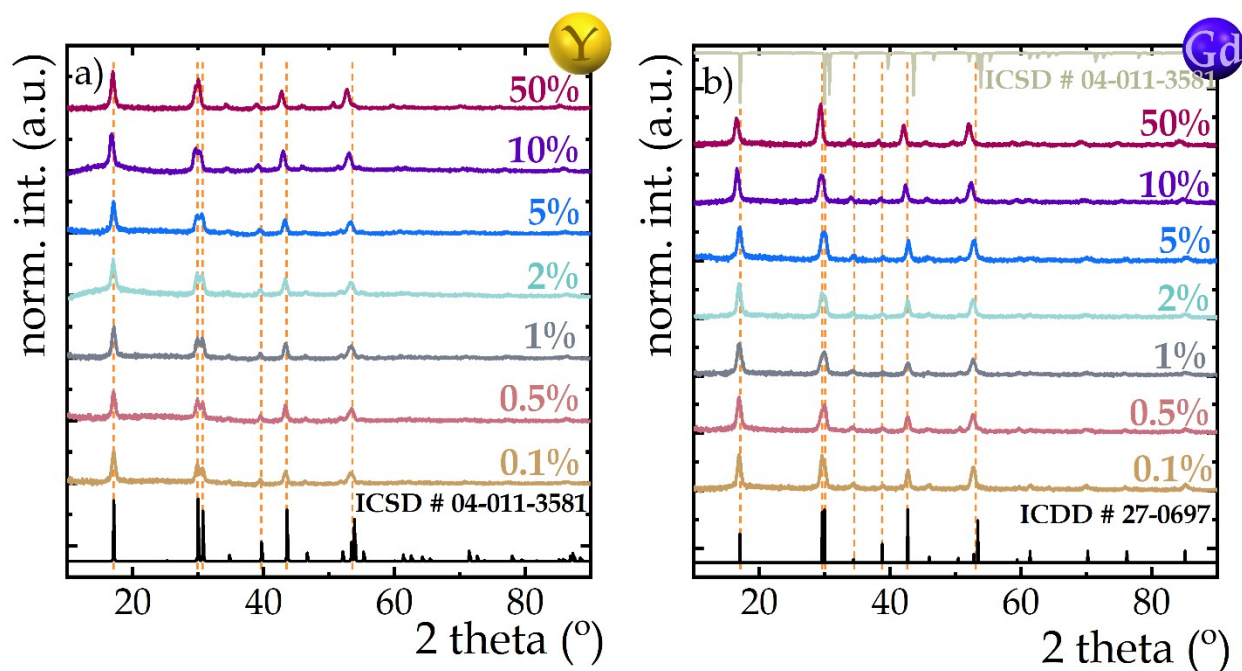

Figure S1. Shift of Bragg reflections towards lower angles for high concentrations of Nd<sup>3+</sup> ions in NaYF<sub>4</sub> (a) and NaGdF<sub>4</sub> (b) host. At the top of figure b) a pattern for NaYF<sub>4</sub> is also shown,

allowing comparison of the shift of Bragg reflections in the NaGdF<sub>4</sub> matrix relative to those in the NaYF<sub>4</sub> counterpart.

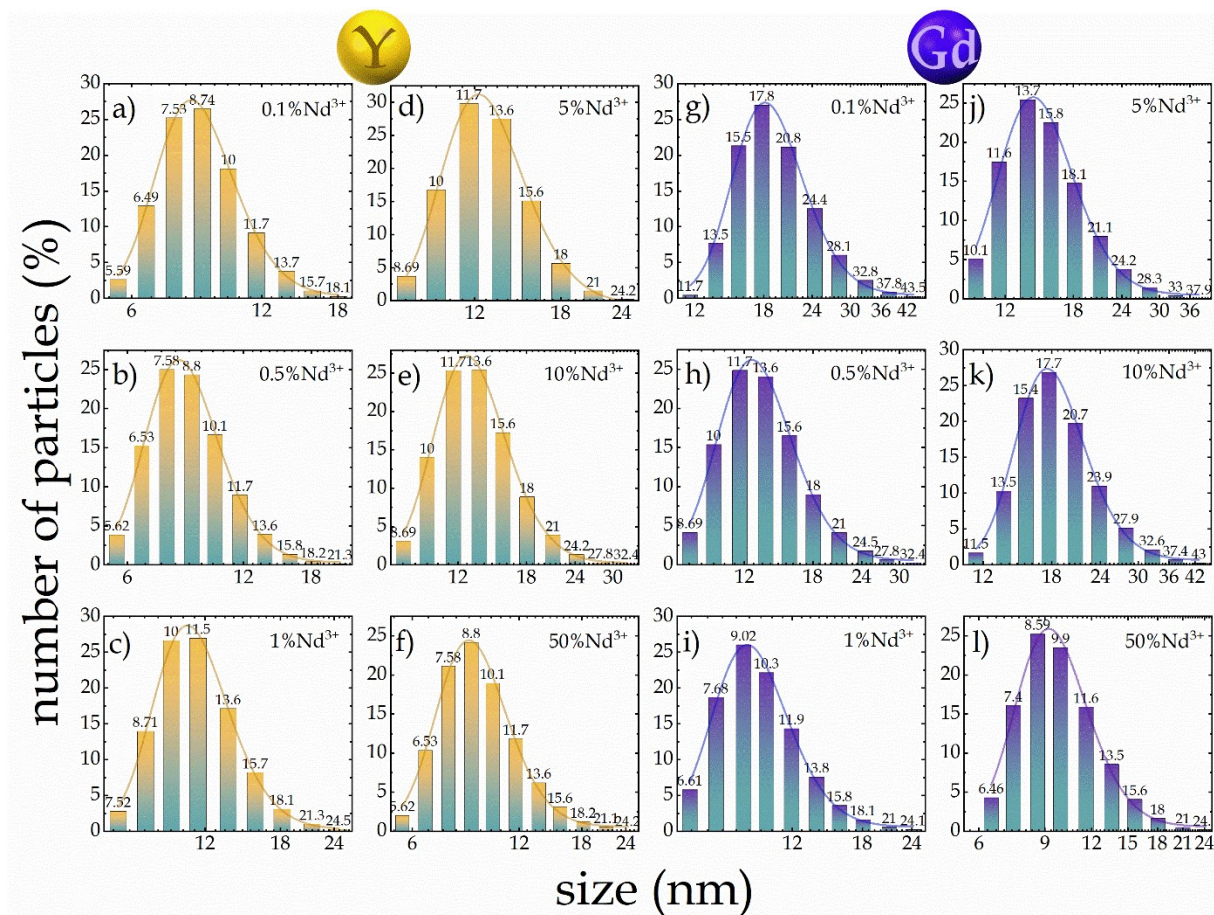

Figure S2. The hydrodynamic size distribution of representative NaYF<sub>4</sub> (a-f) and NaGdF<sub>4</sub>: (g-l) doped with different Nd<sup>3+</sup> concentration ranging from 0.1% to 50% determined from DLS measurement.

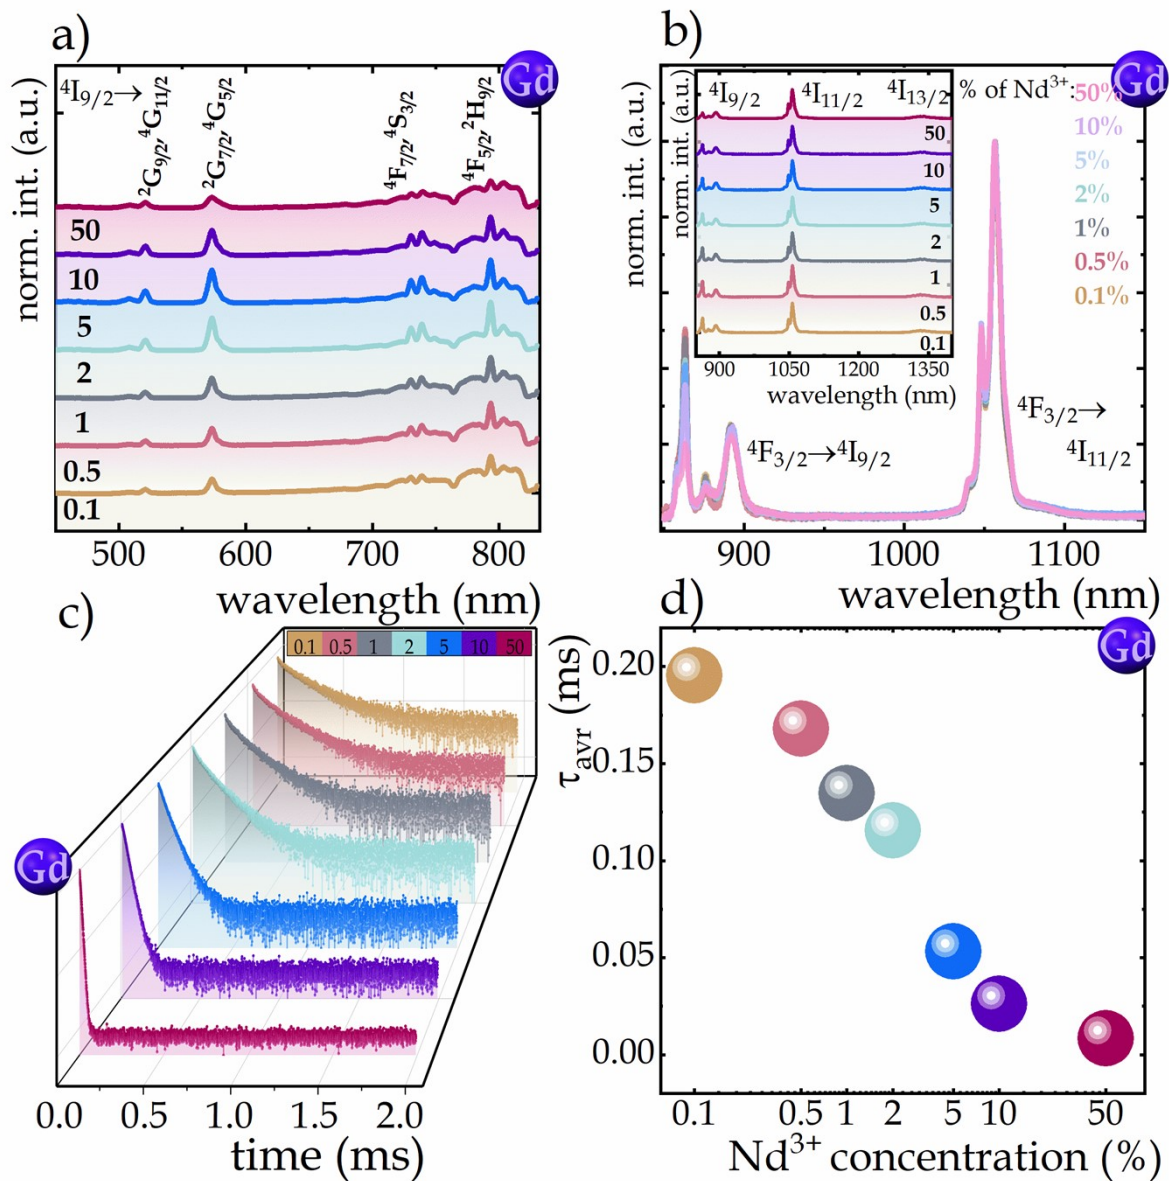

Figure S3. Nd<sup>3+</sup> ions concentration impact on excitation spectra monitored at 1058 nm (a), emission spectra upon 793 nm excitation (b), the kinetics at 123 K of the excited  $4F_{3/2}$  state (c) and average decay time of  $4F_{3/2}$  level at 123K (d) in NaGdF<sub>4</sub> host.



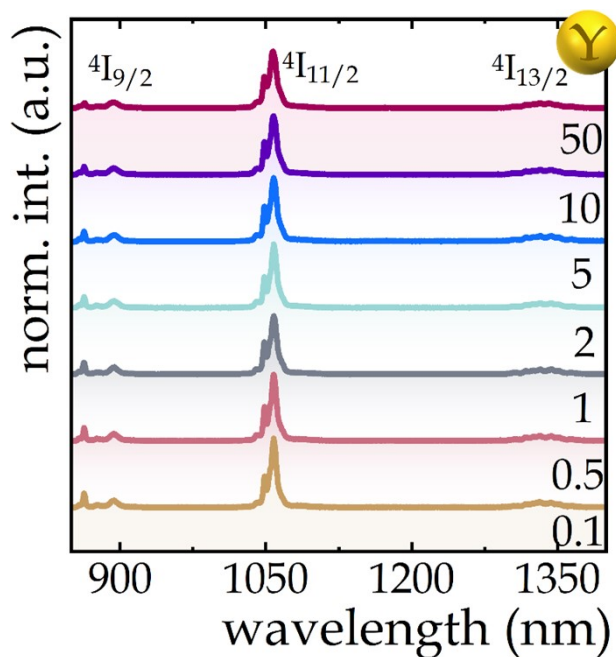

Figure S4. The comparison of the emission spectra upon 793 nm excitation for NaYF<sub>4</sub>:Nd<sup>3+</sup>.

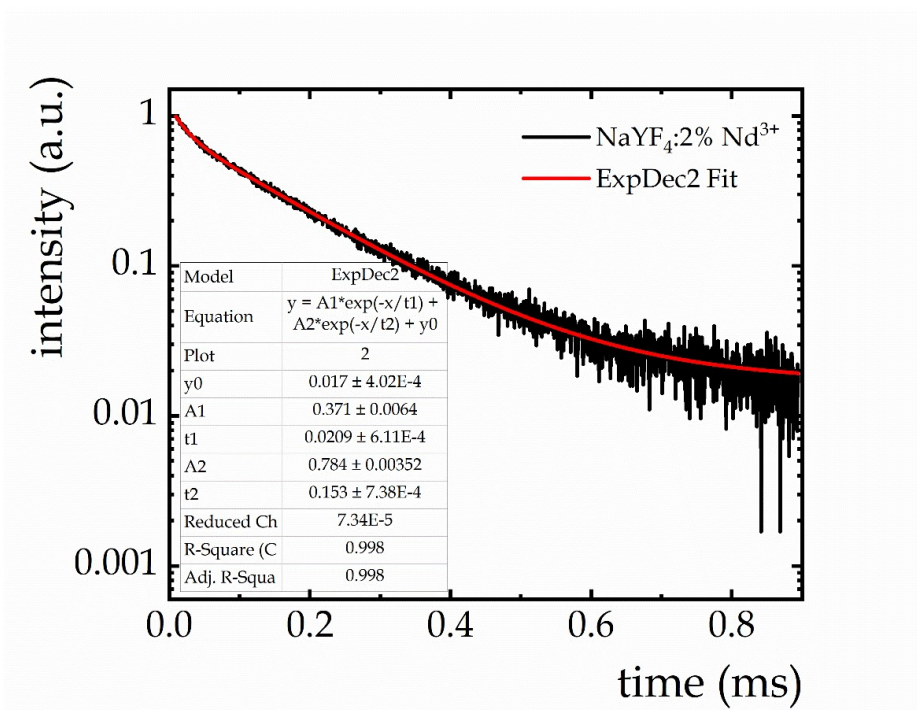

Figure S5. Decay curve and fit curve of the ExpDec2 function of an example NaYF<sub>4</sub>:2%Nd<sup>3+</sup> sample. The table shows the parameter values used to calculate the average time with the double-exponential function according to Equation 1.

Equation in the two-exponential ExpDec2 model:

$$y = A_1 \cdot e^{-x/t_1} + A_2 \cdot e^{-x/t_2} + y_0 \quad (\text{eq. S1})$$

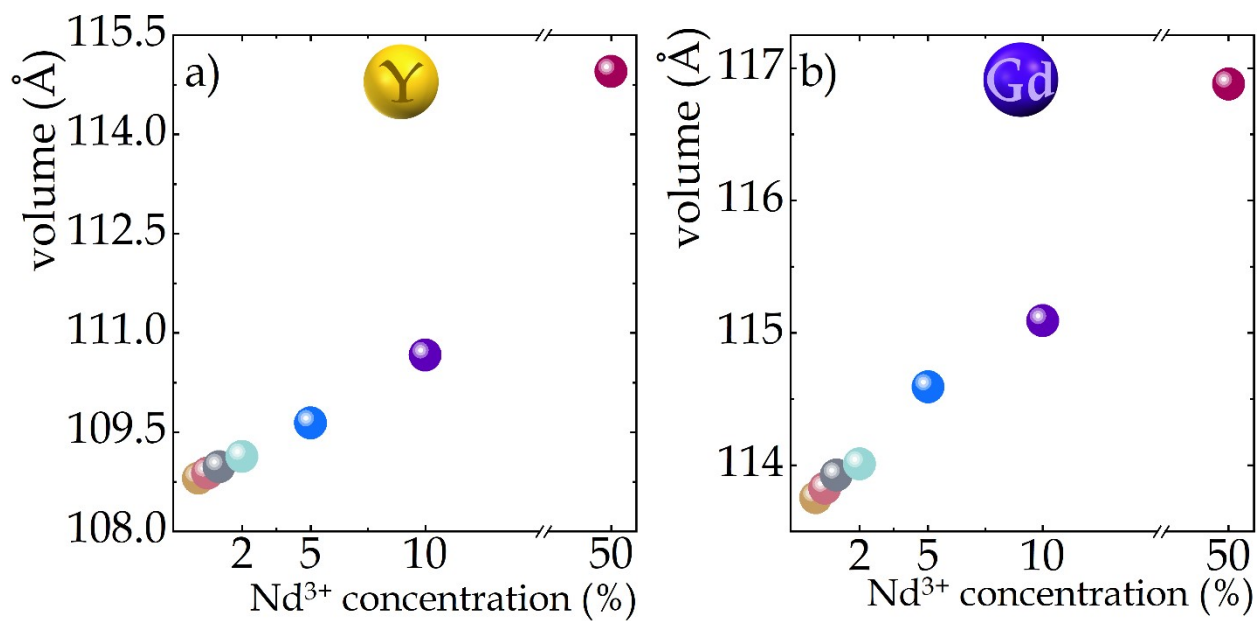

Figure S6. Dependence of unit cell volume on the concentration of Nd<sup>3+</sup> ions in the host NaYF<sub>4</sub> (a) and NaGdF<sub>4</sub> (b)

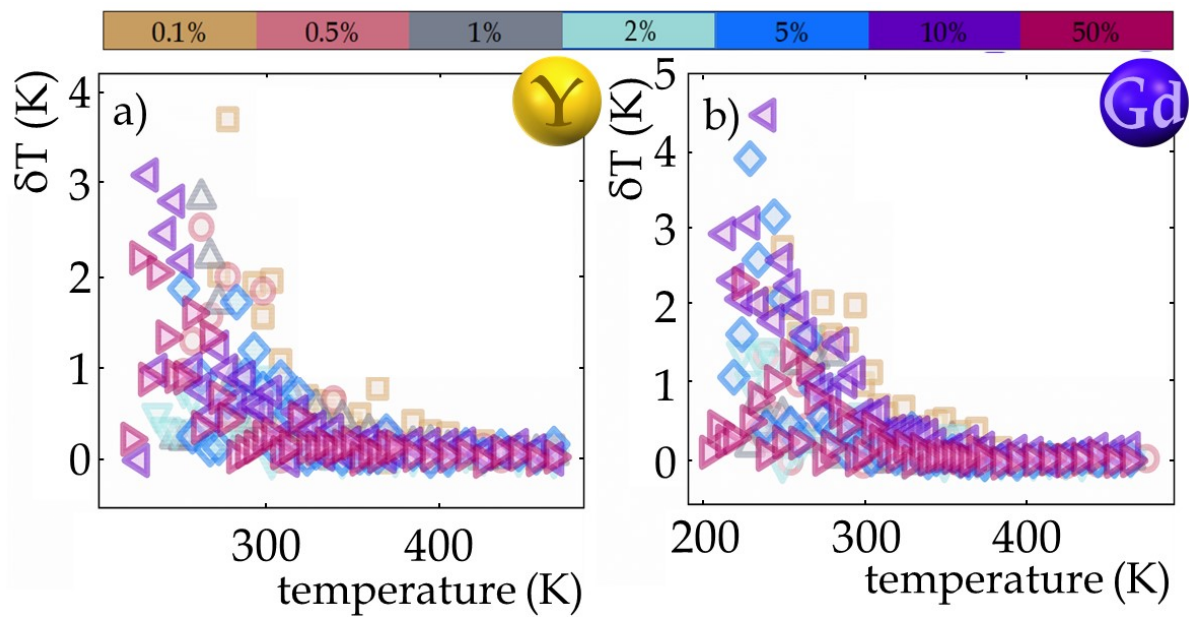

Figure S7. The temperature resolution of Nd<sup>3+</sup>-doped NaYF<sub>4</sub> and NaGdF<sub>4</sub> based LTs (a and b, respectively).
